# Supplementary material
Source: PubMed Central journal article supplement (PMC3563919)

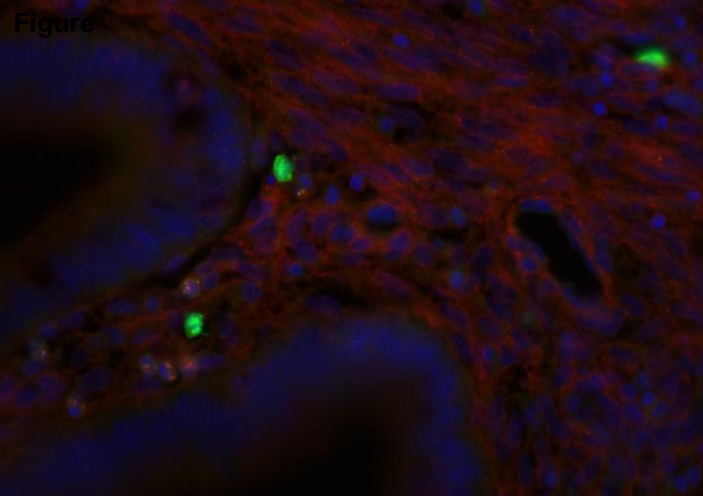

A

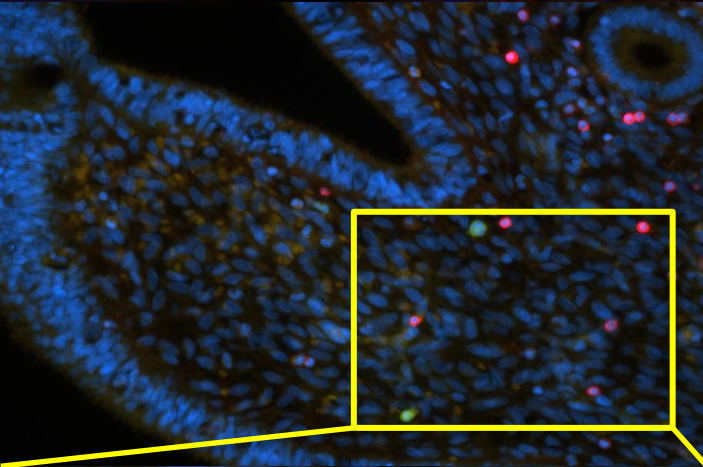

B

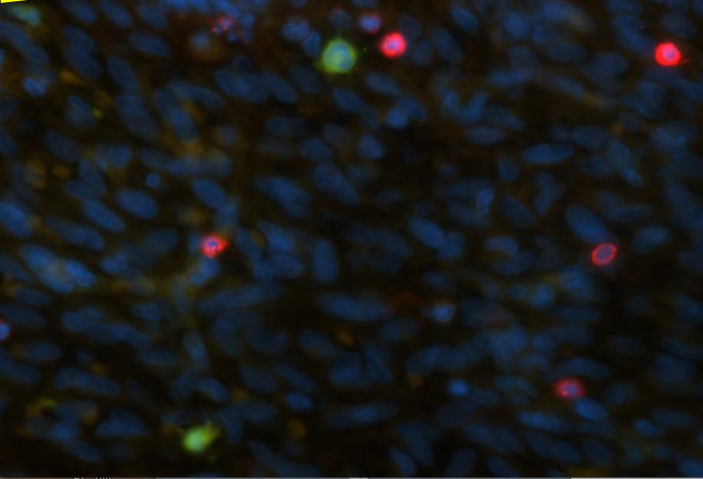

C

Figure

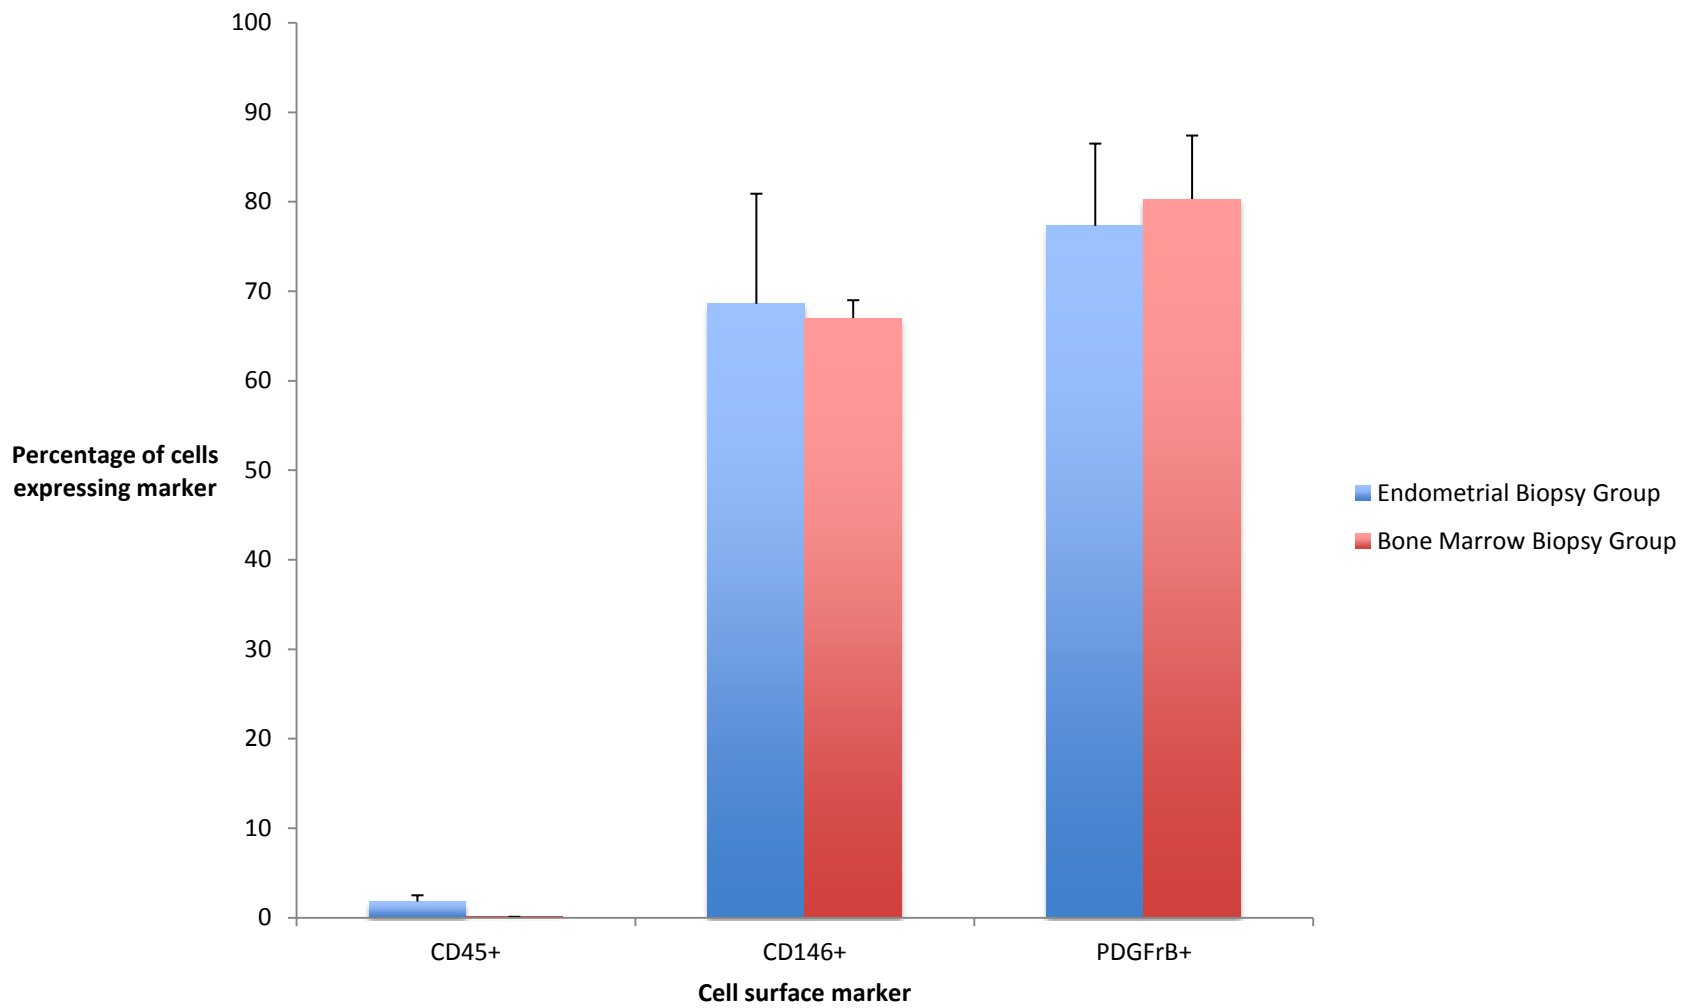

Supplement: NIHMS412715-supplement-01.pdf [file NIHMS412715-supplement-01.pdf]
